# Supplementary material for: Disease Severity and Immune Activity Relate to Distinct Interkingdom Gut Microbiome States in Ethnically Distinct Ulcerative Colitis Patients
Source: PubMed Central journal article supplement (PMC4992973; doi:10.1128/mbio.01072-16), 2016-08-16

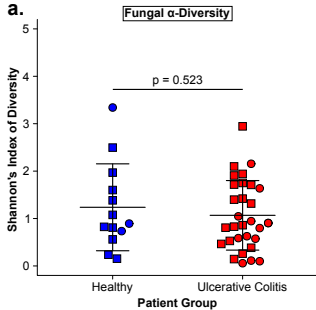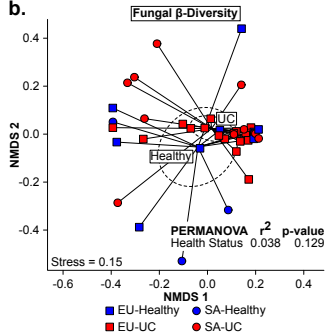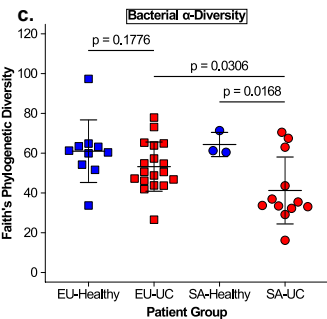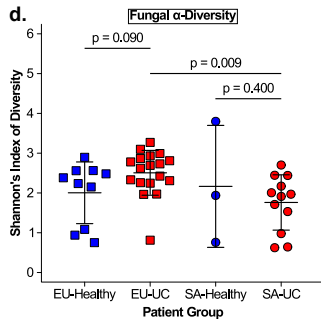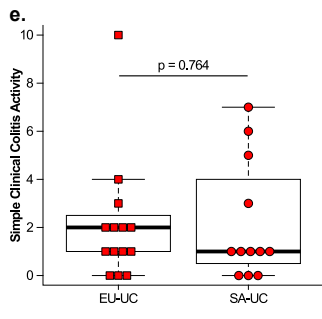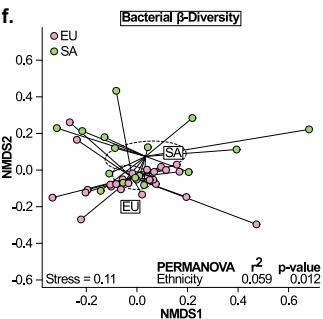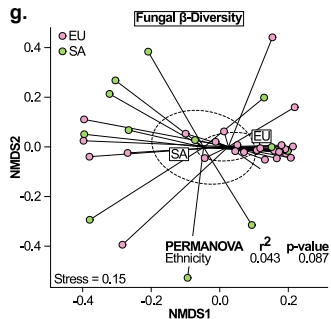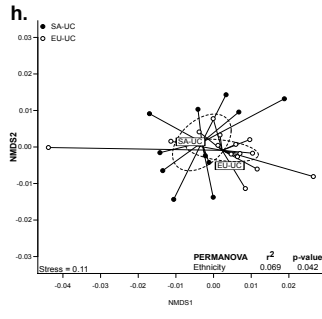

Supplement: mbo004162947sf1.pdf [file mbo004162947sf1.pdf]
